# Supplementary material for: Soil Phosphorus Pools, Bioavailability and Environmental Risk in Response to the Phosphorus Supply in the Red Soil of Southern China
Source: MDPI journal article supplement (doi:10.3390/ijerph17207384), 2020-10-10
Supplement: s1 [file s1]

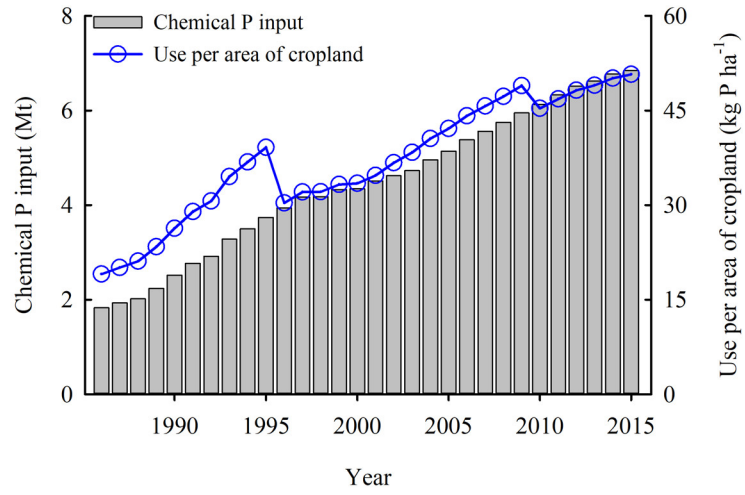

**Figure S1.** The change in chemical P input and use per area of cropland from 1986 to 2015 in China.

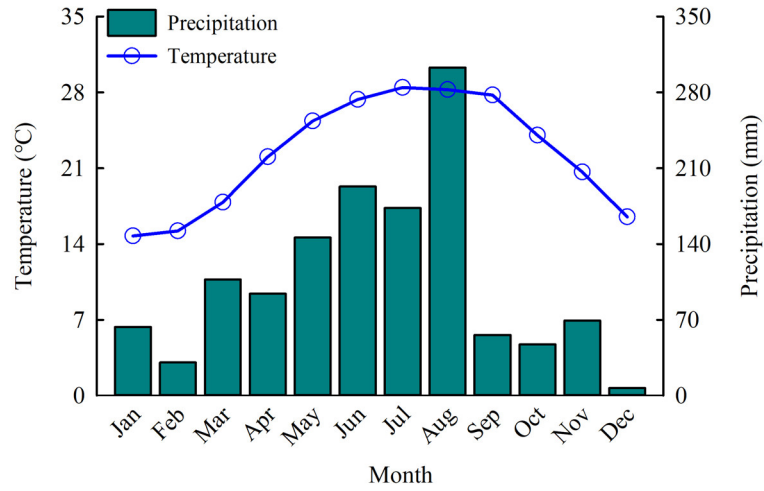

**Figure S2.** Monthly dynamics of air temperature and precipitation in the study years in Zhaoan County, Fujian Province, China.

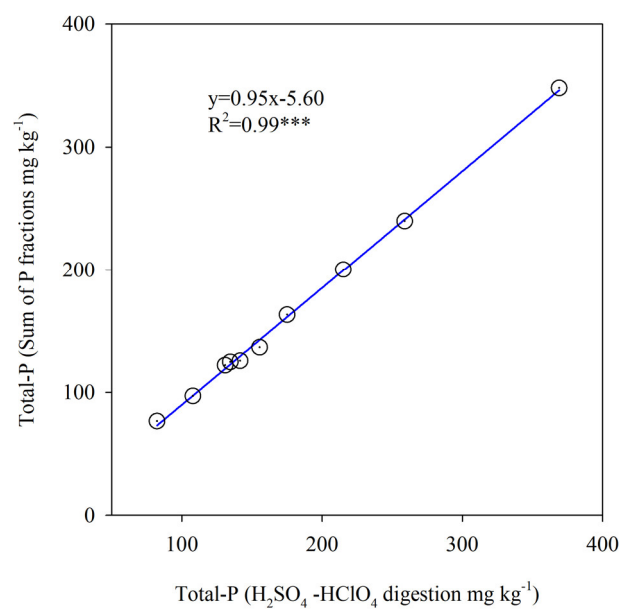

**Figure S3.** Relationship between the sum of all the P fractions and Total-P (H<sub>2</sub>SO<sub>4</sub>-HClO<sub>4</sub>) by analysis.

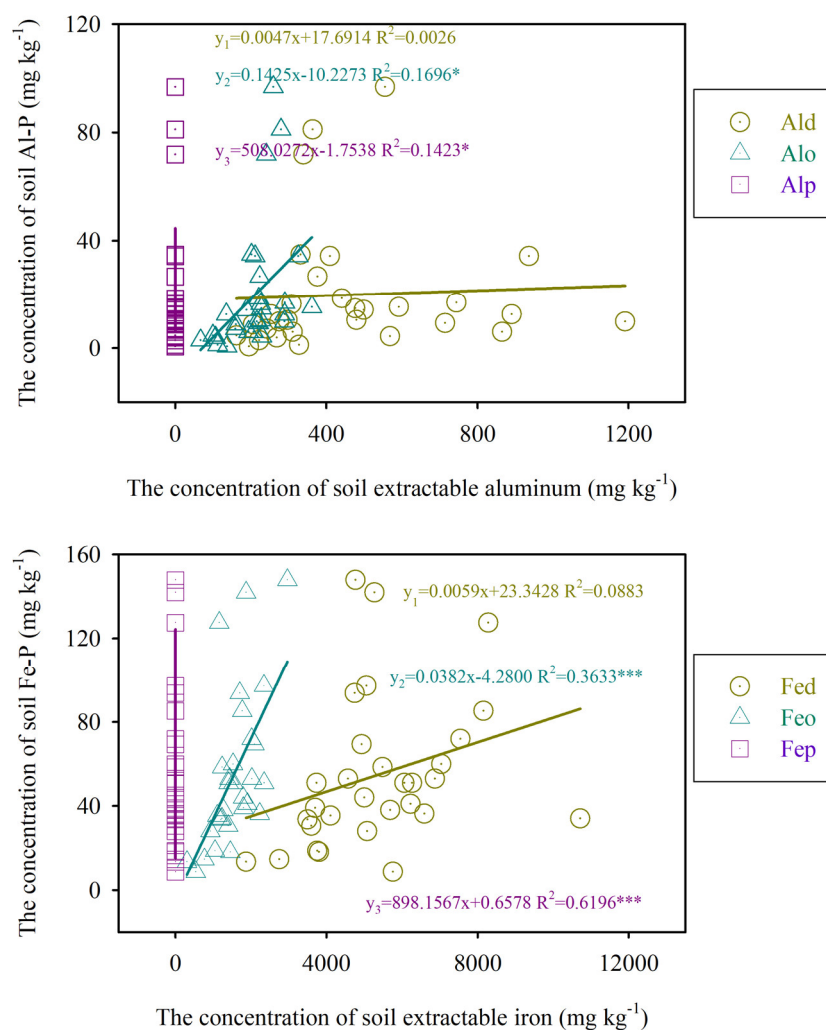

**Figure S4.** Relationship between soil extractable Al/Fe and Al-P/Fe-P come from field experiment. Note: Alp, Fep, Alo, Feo, Ald and Fed refer to organically bound Al oxides, organically bound Fe oxides, non-crystalline Al oxides, non-crystalline Fe oxides, free aluminium and free iron, respectively.
